# Supplementary material for: Understanding how and why audits work: protocol for a realist review of audit programmes to improve hospital care
Source: PubMed Central journal article supplement — BMJ Open. 2017 Jun 14;7(6):e015121. doi: 10.1136/bmjopen-2016-015121 (PMC5541620; doi:10.1136/bmjopen-2016-015121), 2017-06-14
Supplement: bmjopen-2016-015121supp003.pdf [file bmjopen-2016-015121supp003.pdf]

## Supplementary File 2: Search strategy MEDLINE

|                                                                                                                                                                                                                                                                                                                                                                                                                                                                                                                                                                                                                                                                                                                                                                                                                                                                                                                                                                                                                                                                                                                         |
|-------------------------------------------------------------------------------------------------------------------------------------------------------------------------------------------------------------------------------------------------------------------------------------------------------------------------------------------------------------------------------------------------------------------------------------------------------------------------------------------------------------------------------------------------------------------------------------------------------------------------------------------------------------------------------------------------------------------------------------------------------------------------------------------------------------------------------------------------------------------------------------------------------------------------------------------------------------------------------------------------------------------------------------------------------------------------------------------------------------------------|
| MEDLINE (Pubmed)                                                                                                                                                                                                                                                                                                                                                                                                                                                                                                                                                                                                                                                                                                                                                                                                                                                                                                                                                                                                                                                                                                        |
| ("Clinical Audit"[Majr:noexp] OR "Medical Audit"[Majr] OR "Nursing Audit"[Majr] OR "Accreditation"[Majr] OR "Certification"[Majr:noexp] OR "Peer Review, Health Care"[Majr] OR ((extern*[tiab] OR internal*[tiab]) AND audit[tiab]) OR medical audit*[tiab] OR clinical audit*[tiab] OR nursing audit*[tiab] OR audit[ti] OR audits[ti] OR accreditat*[ti] OR visitation*[ti]) AND ("Academic Medical Centers"[Mesh:noexp] OR "Hospitals, Teaching"[Mesh] OR "Outpatient Clinics, Hospital"[Mesh:noexp] OR "Hospitals"[Mesh:noexp] OR hospital*[tiab] OR ((health*[tiab] OR clinical[tiab]) AND (organisation*[tiab] OR organization*[tiab] OR center*[tiab] OR centre*[tiab]))) OR health sector*[tiab] OR healthcare sector*[tiab] OR health care sector*[tiab]) AND ("Efficiency, Organizational"[Mesh] OR efficien*[tiab] OR effectiveness*[tiab] OR performan*[tiab] OR improvement*[tiab] OR "Quality Improvement"[Mesh:noexp] OR "Quality Assurance, Health Care"[Majr:noexp] OR quality improv*[ti] OR quality assur*[ti]) NOT ("Animals"[Mesh] NOT "Humans"[Mesh]) AND english[la] AND ("last 10 years"[PDat]) |
